# Supplementary material for: C–H⋯S interaction exhibits all the characteristics of conventional hydrogen bonds
Source: Royal Society of Chemistry journal article supplement (doi:10.1039/d0cp01508c), 2020-01-01
Supplement: d0cp01508c1.pdf [file d0cp01508c1.pdf]

## Supporting information

# **C-H···S Interaction Exhibits all the Characteristics of Conventional Hydrogen Bonds**

*Sanat Ghosh,<sup>‡</sup> Pragya Chopra,<sup>‡</sup> and Sanjay Wategaonkar\**

Department of Chemical Sciences, Tata Institute of Fundamental Research, Homi Bhabha Road, Mumbai 400 005, India.

<sup>‡</sup> Departamento de Química Física, Facultad de Ciencias Químicas, Universidad Complutense de Madrid, 28040 Madrid, Spain.

<sup>‡</sup> Deutsches Elektronen Synchrotron (DESY), Hamburg, Germany.

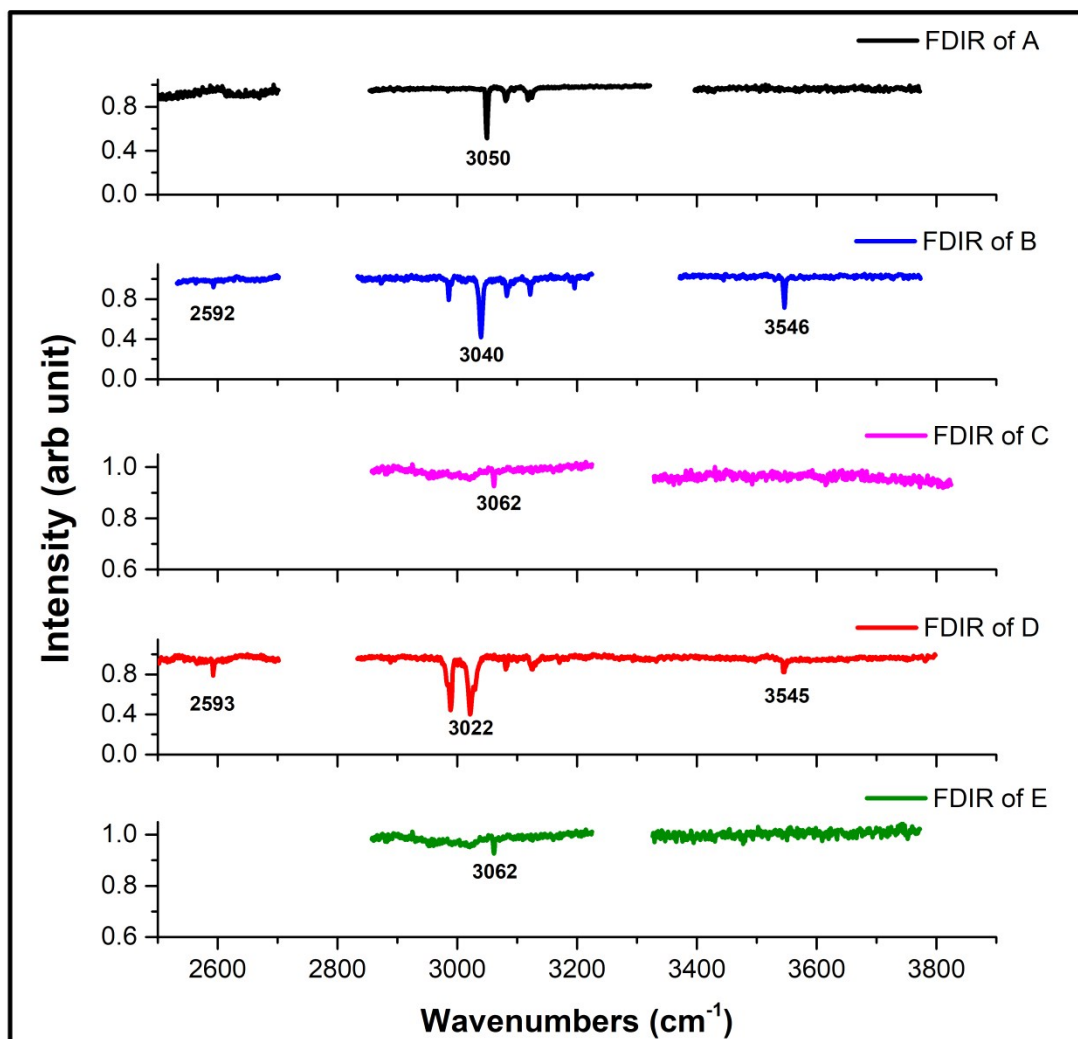

**Fig. S1** FDIR spectra of the LIF transitions A, B, C, D, and E in the C-H, S-H and O-H frequency region. FDIR spectra of A, C, and E did not show any O-H transition. FDIR spectra of B and D showed both O-H transition and S-H transition, i.e., they are mixed clusters of TCNB with  $\text{H}_2\text{O}$  and  $\text{H}_2\text{S}$ . FDIR spectrum of A did not show any S-H transition because its intrinsic IR transition probability in  $\text{H}_2\text{S}$  is very low. FDIR spectra of C and E in the S-H region were not recorded.

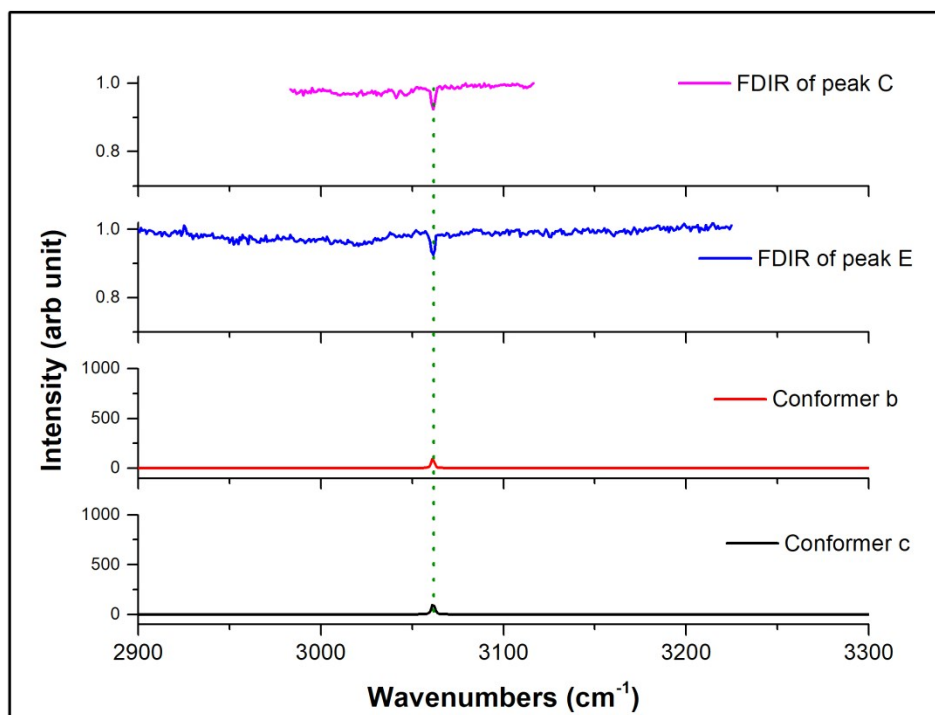

**Fig. S2** Comparison of the FDIR spectra of C and E transitions with the computed IR spectra of the conformer 'b' and 'c' computed at the *cp*-MP2/aug-cc-pVDZ level.

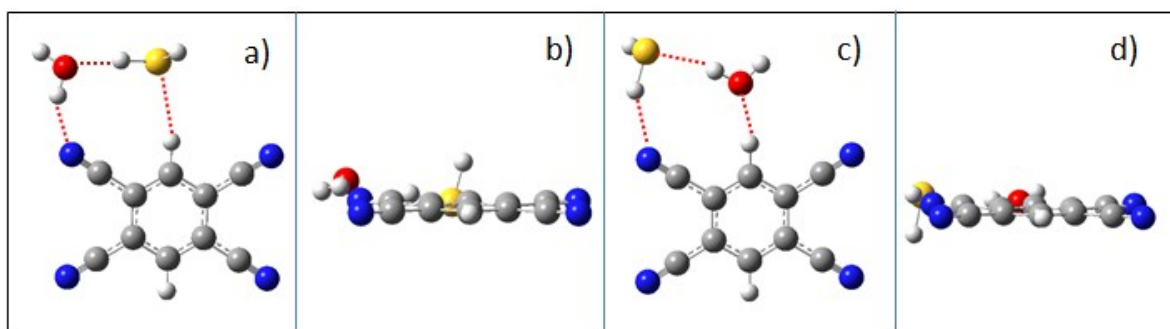

**Fig. S3** Structures of the mixed clusters of TCNB with H<sub>2</sub>O and H<sub>2</sub>S. Figure ‘a’ and ‘b’ are the top view and side view of the conformer ‘SO’ and Figure ‘c’ and ‘d’ are the top view and side view of the conformer ‘OS’.

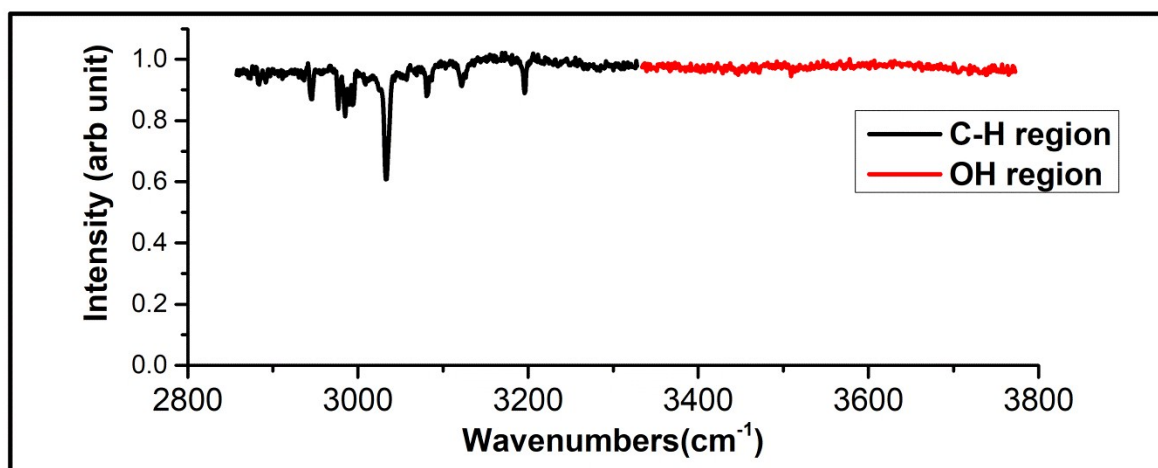

**Fig. S4** FDIR spectrum of LIF transition F, extended to the O-H frequency region to confirm the absence of mixed cluster.

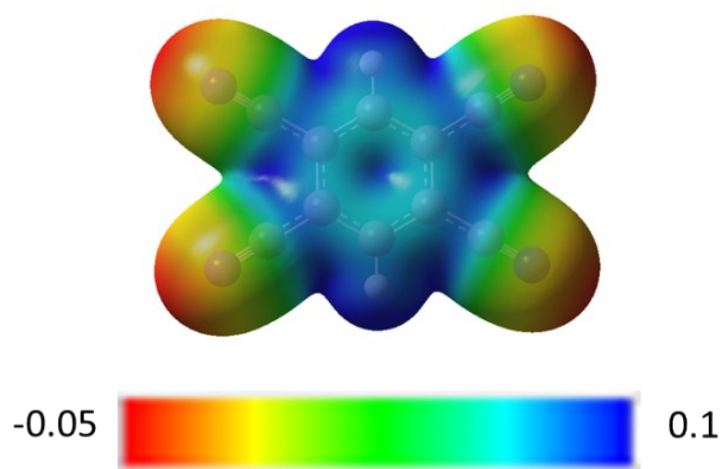

**Fig. S5** MEP graph of TCNB monomer calculated at the  $\omega$ B97X-D/6-311++G\*\* level. The scale bar indicates the magnitude and the sign of the potential.

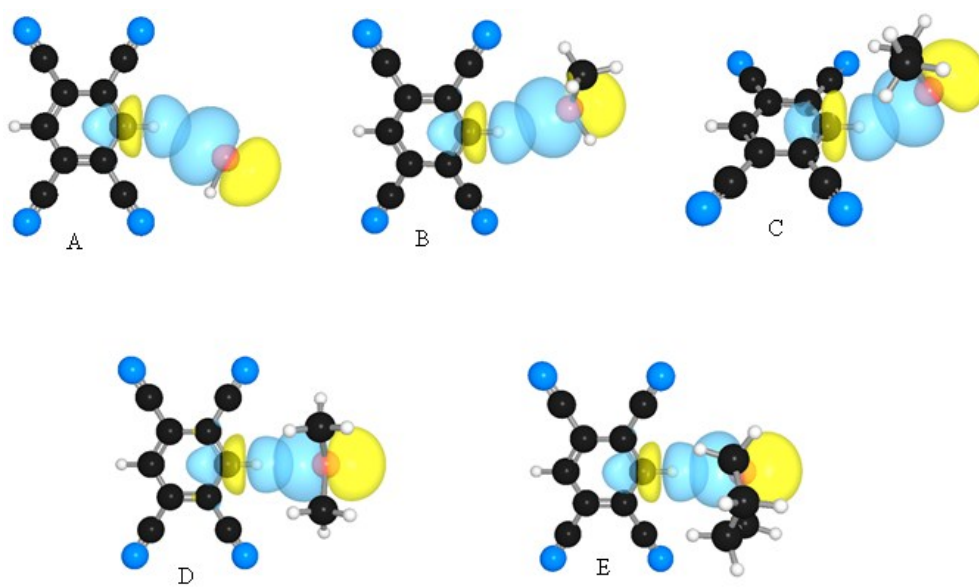

**Fig. S6** Natural bond orbitals involved in the C-H $\cdots$ S H-bonding interactions. A) TCNB-H<sub>2</sub>S, B) TCNB-MeSH, C) TCNB-EtSH, D) TCNB-DMS, E) TCNB-THT.

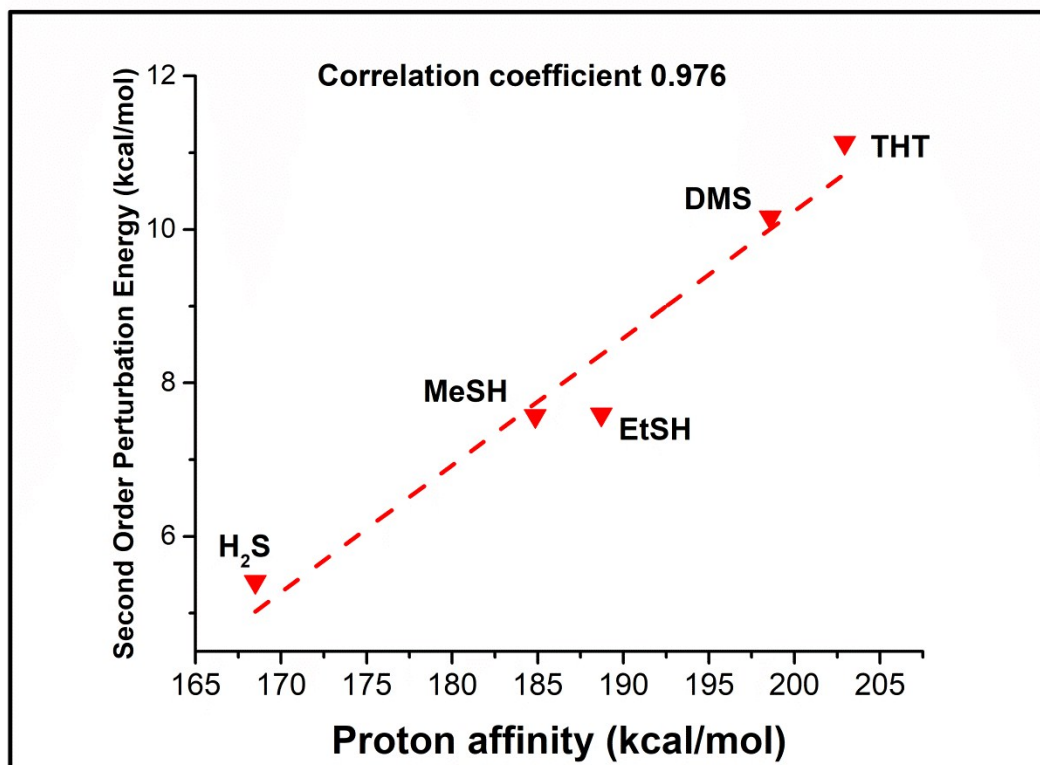

**Fig. S7** Correlation plot of the second order perturbation energies for the C-H $\cdots$ S bound conformers and proton affinities of the solvents. Second order perturbation energies were calculated using NBO theory at the *cp- $\omega$ B97X-D/aug-cc-pVDZ* level.

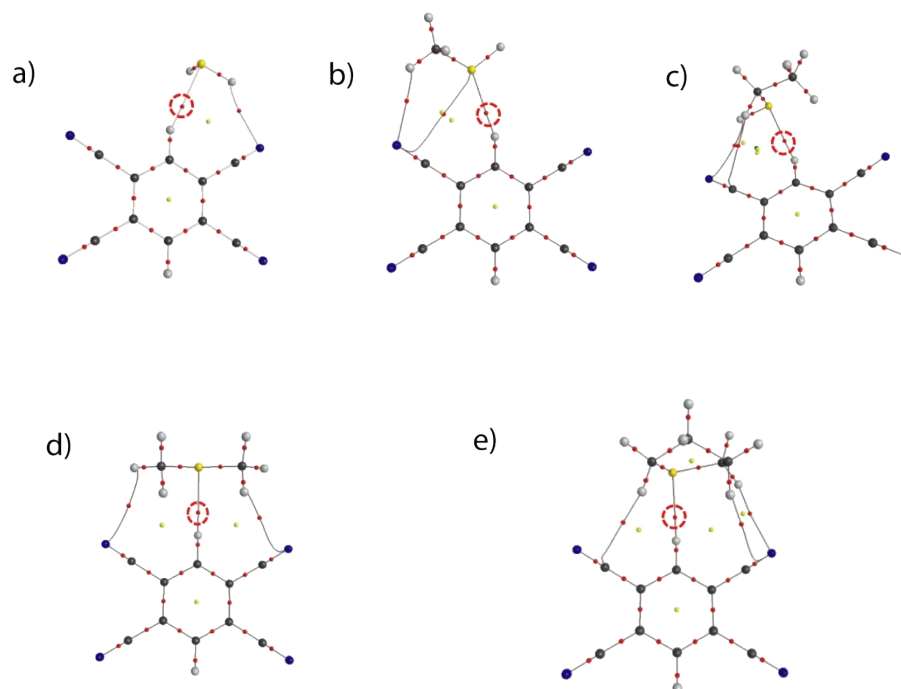

**Fig. S8** Molecular graphs of the C-H $\cdots$ S H-bond bound conformers calculated using QTAIM calculation at the *cp- $\omega$ B97X-D/aug-cc-pVDZ* level. a) TCNB-H<sub>2</sub>S, b) TCNB-MeSH, c) TCNB-EtSH, d) TCNB-DMS and e) TCNB-THT. Red dotted circles indicate BCPs at the C-H $\cdots$ S bond paths.



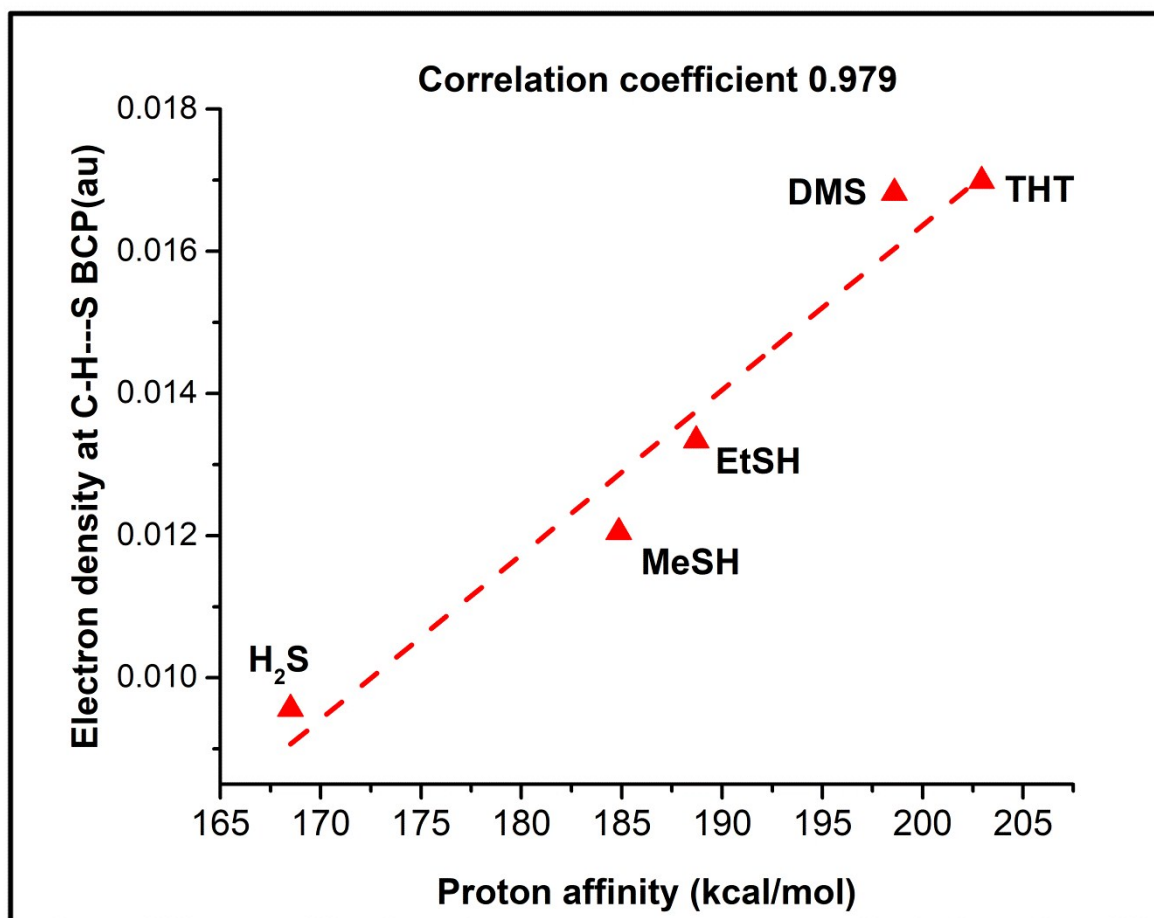

**Fig. S9** Correlation plot of electron densities at the C-H...S BCPs versus the PA of the solvents. Electron densities are calculated using QTAIM analysis on the optimized geometries of the C-H...S bound conformers obtained at the *cp- $\omega$ B97X-D/aug-cc-pVDZ* level.

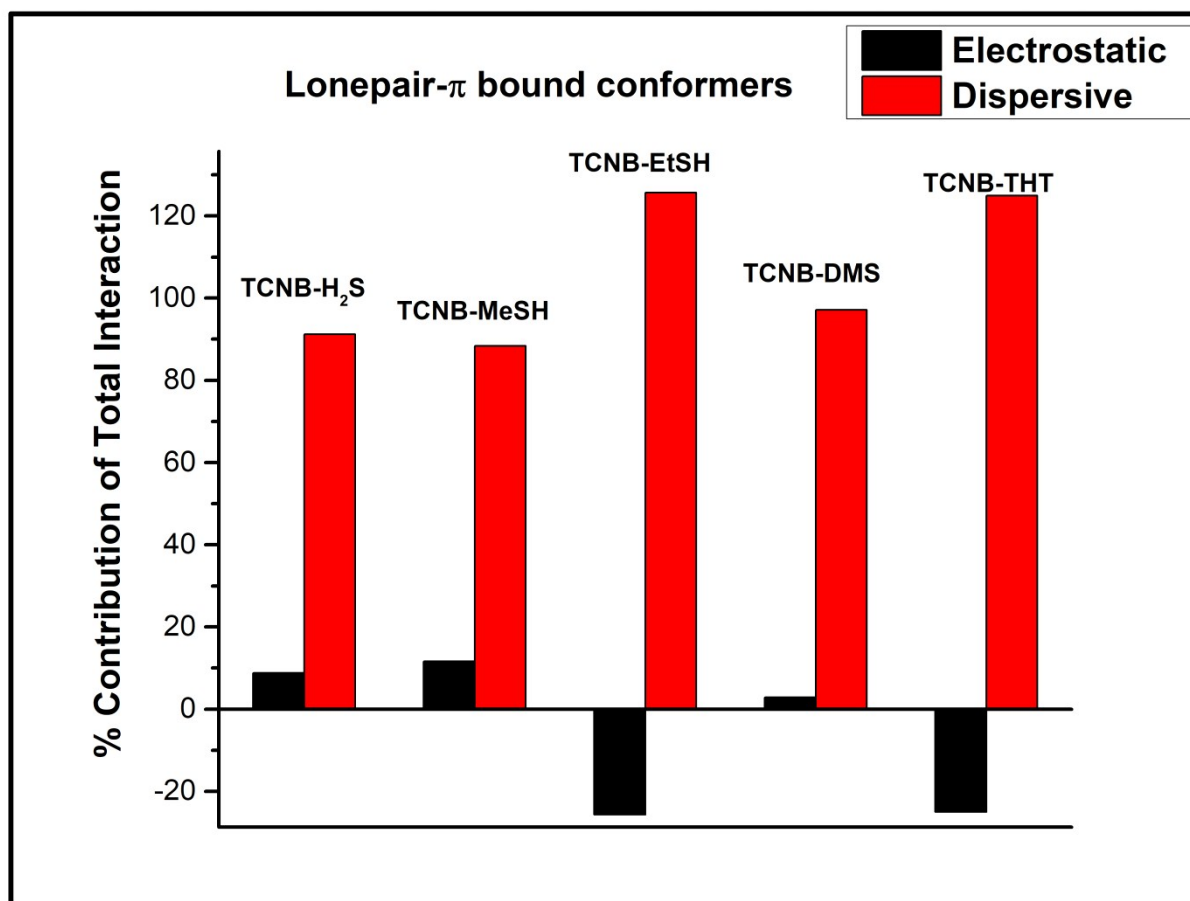

**Fig. S10** % contribution of the electrostatic and dispersion interaction to the total stabilization energy of the lp- $\pi$  bound conformers of TCNB with different S-containing solvents calculated at *cp- $\omega$ B97X-D/cc-pVDZ* level.

**Table S1:** H-bond related geometrical parameters of the C-H $\cdots$ S bound conformers of the TCNB complexes with different S-containing solvents computed at *cp*-MP2/aug-cc-pVDZ and *cp*- $\omega$ B97X-D/aug-cc-pVDZ levels.

| Complex                                 | C-H bond length (Å) | Increase in C-H bond length (Å) | C-H $\cdots$ S HB length (Å) | $\angle$ CHS (°) |
|-----------------------------------------|---------------------|---------------------------------|------------------------------|------------------|
| <i>cp</i> -MP2/aug-cc-pVDZ              |                     |                                 |                              |                  |
| TCNB                                    | 1.093               | --                              | --                           | --               |
| TCNB-H <sub>2</sub> S                   | 1.095               | 0.002                           | 2.859                        | 154              |
| TCNB-MeSH                               | 1.094               | 0.001                           | 2.793                        | 144              |
| TCNB-EtSH                               | 1.095               | 0.002                           | 2.732                        | 163              |
| TCNB-DMS                                | 1.099               | 0.006                           | 2.547                        | 162              |
| TCNB-THT                                | 1.099               | 0.006                           | 2.565                        | 160              |
| <i>cp</i> - $\omega$ B97X-D/aug-cc-pVDZ |                     |                                 |                              |                  |
| TCNB                                    | 1.088               | --                              | --                           | --               |
| TCNB-H <sub>2</sub> S                   | 1.091               | 0.003                           | 2.806                        | 157              |
| TCNB-MeSH                               | 1.092               | 0.004                           | 2.691                        | 162              |
| TCNB-EtSH                               | 1.092               | 0.004                           | 2.638                        | 153              |
| TCNB-DMS                                | 1.095               | 0.007                           | 2.518                        | 164              |
| TCNB-THT                                | 1.095               | 0.007                           | 2.512                        | 166              |

**Table S2:** Free energies of formation ( $\Delta_f G$ ) at 0.05, 5, 50, 100, 150, 200, 250 and 298.15 K for all the conformers of TCNB complexes with S-containing solvents computed at the *cp- $\omega$ B97X-D/aug-cc-pVDZ* level in kcal/mole.

| Complex               | Type of interaction | $\Delta_f G_{5}^{0.0}$ | $\Delta_f G_{5}$ | $\Delta_f G_{0}^{5}$ | $\Delta_f G_{0}^{10}$ | $\Delta_f G_{0}^{15}$ | $\Delta_f G_{0}^{20}$ | $\Delta_f G_{0}^{25}$ | $\Delta_f G_{5}^{298.1}$ |
|-----------------------|---------------------|------------------------|------------------|----------------------|-----------------------|-----------------------|-----------------------|-----------------------|--------------------------|
| TCNB-H <sub>2</sub> S | C-H...S             | -3.19                  | -3.15            | -2.13                | -0.88                 | 0.34                  | 1.50                  | 2.63                  | 3.69                     |
|                       | lp- $\pi$           | -3.63                  | -3.59            | -2.52                | -1.24                 | 0.00                  | 1.20                  | 2.35                  | 3.43                     |
|                       | S-H...N             | -1.44                  | -1.41            | -0.78                | -0.06                 | 0.61                  | 1.23                  | 1.81                  | 2.33                     |
| TCNB-MeSH             | C-H...S             | -4.68                  | -4.61            | -3.31                | -1.87                 | -0.49                 | 0.83                  | 2.11                  | 3.31                     |
|                       | lp- $\pi$           | -5.96                  | -5.88            | -4.41                | -2.69                 | -1.04                 | 0.56                  | 2.11                  | 3.57                     |
|                       | S-H...N             | -2.31                  | -2.24            | -0.85                | 0.77                  | 2.36                  | 3.92                  | 5.47                  | 6.94                     |
| TCNB-EtSH             | C-H...S             | -5.20                  | -5.10            | -3.76                | -2.29                 | -0.89                 | 0.46                  | 1.76                  | 2.97                     |
|                       | lp- $\pi$           | -6.22                  | -6.12            | -4.58                | -2.84                 | -1.17                 | 0.45                  | 2.01                  | 3.49                     |
| TCNB-DMS              | C-H...S             | -5.71                  | -5.63            | -4.25                | -2.74                 | -1.32                 | 0.05                  | 1.37                  | 2.60                     |
|                       | lp- $\pi$ I         | -7.26                  | -7.17            | -5.63                | -3.87                 | -2.17                 | -0.52                 | 1.08                  | 2.58                     |
|                       | lp- $\pi$ II        | -3.33                  | -3.24            | -1.83                | -0.31                 | 1.13                  | 2.50                  | 3.83                  | 5.07                     |
| TCNB-THT              | C-H...S             | -6.65                  | -6.55            | -5.07                | -3.46                 | -1.93                 | -0.46                 | 0.97                  | 2.31                     |

**Table S3:**  $\Delta$ ZPE, BSSE, and BSSE and ZPE corrected binding energies (kcal/mol) of all the conformers of TCNB with different S-containing solvents computed at various levels using aug-cc-pVDZ basis set.

| Complex                     | Type of interaction | $\Delta$ ZPE                | BSSE | Binding Energy |
|-----------------------------|---------------------|-----------------------------|------|----------------|
| <b>TCNB-H<sub>2</sub>S</b>  |                     |                             |      |                |
| <i>cp</i> -MP2              | C-H $\cdots$ S      | 0.85                        | 1.43 | 3.19           |
|                             | S-H $\cdots$ N      | 0.63                        | 0.86 | 1.44           |
|                             | Lone pair- $\pi$    | 0.75                        | 1.54 | 3.63           |
| <i>cp</i> -B3LYP            | C-H $\cdots$ S      | 0.74                        | 0.21 | 1.37           |
|                             | S-H $\cdots$ N      | 0.73                        | 0.28 | 0.46           |
|                             | Lone pair- $\pi$    | 0.81                        | 0.23 | 0.34           |
| <i>cp</i> - $\omega$ B97X-D | C-H $\cdots$ S      | 0.71                        | 0.32 | 3.22           |
|                             | S-H $\cdots$ N      | 0.80                        | 0.24 | 0.98           |
|                             | Lone pair- $\pi$    | 1.49                        | 0.29 | 2.63           |
| <i>cp</i> -M06-2X           | C-H $\cdots$ S      | 1.77                        | 0.34 | 2.06           |
|                             | S-H $\cdots$ N      | 2.02                        | 0.26 | -0.40          |
|                             | Lone pair- $\pi$    | 1.62                        | 0.33 | 2.89           |
| <b>TCNB-MeSH</b>            |                     |                             |      |                |
| <i>cp</i> -MP2              | C-H $\cdots$ S      | 0.60                        | 1.84 | 4.68           |
|                             | S-H $\cdots$ N      | 0.42                        | 1.46 | 2.31           |
|                             | Lone pair- $\pi$    | 0.65                        | 2.40 | 5.96           |
| <i>cp</i> -B3LYP            | C-H $\cdots$ S      | 0.51                        | 0.36 | 2.29           |
|                             | S-H $\cdots$ N      | Converged to C-H $\cdots$ S |      |                |
|                             | Lone pair- $\pi$    | 0.50                        | 0.35 | 1.51           |
| <i>cp</i> - $\omega$ B97X-D | C-H $\cdots$ S      | 0.67                        | 0.53 | 4.43           |
|                             | S-H $\cdots$ N      | 0.80                        | 0.39 | 1.52           |
|                             | Lone pair- $\pi$    | 0.71                        | 0.57 | 5.23           |
| <i>cp</i> -M06-2X           | C-H $\cdots$ S      | 1.14                        | 0.46 | 3.87           |
|                             | S-H $\cdots$ N      | 1.10                        | 0.55 | 1.26           |
|                             | Lone pair- $\pi$    | 1.29                        | 0.69 | 5.30           |
| <b>TCNB-EtSH</b>            |                     |                             |      |                |
| <i>cp</i> -MP2              | C-H $\cdots$ S      | 0.52                        | 2.21 | 5.20           |
|                             | Lone pair- $\pi$    | 0.39                        | 4.31 | 6.22           |
| <i>cp</i> -B3LYP            | C-H $\cdots$ S      | 0.45                        | 0.37 | 2.38           |
|                             | Lone pair- $\pi$    | 0.44                        | 0.36 | 1.42           |
| <i>cp</i> - $\omega$ B97X-D | C-H $\cdots$ S      | 1.08                        | 0.67 | 4.72           |
|                             | Lone pair- $\pi$    | 0.92                        | 0.93 | 4.97           |
| <i>cp</i> -M06-2X           | C-H $\cdots$ S      | 0.79                        | 0.83 | 4.08           |
|                             | Lone pair- $\pi$    | 1.06                        | 1.21 | 4.35           |
| <b>TCNB-DMS</b>             |                     |                             |      |                |
| <i>cp</i> -MP2              | C-H $\cdots$ S      | 0.40                        | 2.99 | 5.71           |
|                             | Lone pair- $\pi$    | 0.60                        | 3.26 | 7.26           |

|                             |                     |                             |      |            |
|-----------------------------|---------------------|-----------------------------|------|------------|
|                             | Lone pair- $\pi$ I  | 0.22                        | 4.13 | 3.33       |
| <i>cp</i> -B3LYP            | C-H $\cdots$ S      | 0.45                        | 0.46 | 2.80       |
|                             | Lone pair- $\pi$ I  | 0.45                        | 0.54 | 1.72       |
|                             | Lone pair- $\pi$ II |                             |      | Not stable |
| <i>cp</i> - $\omega$ B97X-D | C-H $\cdots$ S      | 0.67                        | 0.85 | 5.56       |
|                             | Lone pair- $\pi$ I  | 0.75                        | 0.81 | 6.26       |
|                             | Lone pair- $\pi$ II | 0.82                        | 1.07 | 2.62       |
| <i>cp</i> -M06-2X           | C-H $\cdots$ S      | 0.67                        | 0.97 | 4.79       |
|                             | Lone pair- $\pi$ I  | 0.70                        | 0.95 | 6.76       |
|                             | Lone pair- $\pi$ II | 0.39                        | 1.27 | 2.16       |
| <b>TCNB-THT</b>             |                     |                             |      |            |
| <i>cp</i> -MP2              | C-H $\cdots$ S      | 0.37                        | 3.61 | 6.65       |
|                             | Lone pair- $\pi$    |                             |      |            |
| <i>cp</i> -B3LYP            | C-H $\cdots$ S      | 0.42                        | 0.53 | 3.03       |
|                             | Lone pair- $\pi$    | Converged to C-H $\cdots$ S |      |            |
| <i>cp</i> - $\omega$ B97X-D | C-H $\cdots$ S      | 0.58                        | 0.83 | 6.47       |
|                             | Lone pair- $\pi$    | 0.48                        | 1.07 | 6.41       |
| <i>cp</i> -M06-2X           | C-H $\cdots$ S      | 0.58                        | 0.92 | 5.25       |
|                             | Lone pair- $\pi$    | 0.85                        | 0.92 | 6.62       |

**Table S4:** Different components of the interaction energy for the C-H...S bound conformers of the complexes of TCNB with different S-containing solvents using NEDA. All the components are in kcal/mol.

| Complex               | Electrical (ES+POL+SE) | Charge transfer | Core (EX+DEF-SE) | $E_{int}$ | $E_{disp}$ | $E_{total}$ | % Dispersion |
|-----------------------|------------------------|-----------------|------------------|-----------|------------|-------------|--------------|
| TCNB-H <sub>2</sub> S | -7.84                  | -7.30           | 13.68            | -1.47     | -2.62      | -4.09       | 64.02        |
| TCNB-MeSH             | -9.61                  | -9.78           | 17.44            | -1.95     | -3.20      | -5.15       | 62.15        |
| TCNB-EtSH             | -10.23                 | -11.80          | 22.15            | 0.11      | -5.95      | -5.84       | 101.88       |
| TCNB-DMS              | -11.51                 | -14.58          | 25.71            | -0.37     | -5.65      | -6.02       | 93.85        |
| TCNB-THT              | -12.22                 | -16.07          | 28.39            | 0.10      | -7.03      | -6.93       | 101.44       |

$E_{total}$  = BE of the complexes predicted by dispersion corrected function *cp- $\omega$ B97X-D/cc-pVDZ* level.

$E_{int}$  =  $E_{electrostatic}$  = Electrical (ES+POL+SE) + Charge Transfer + Core (EX+DEF-SE);

ES= Static energy, POL= Polarization energy, SE= Self-energy, EX= Exchange energy, DEF= Deformation energy.

$E_{disp}$  = ( $E_{total}$  -  $E_{int}$ )

**Table S5:** Different components of the interaction energy of the lp- $\pi$  bound conformers calculated using NEDA. All the components are in kcal/mol.

| Complex               | Electrical (ES+POL+SE) | Charge transfer | Core (EX+DEF-SE) | $E_{int}$ | $E_{disp}$ | $E_{total}$ | % Dispersion |
|-----------------------|------------------------|-----------------|------------------|-----------|------------|-------------|--------------|
| TCNB-H <sub>2</sub> S | -7.60                  | -3.71           | 10.98            | -0.33     | -3.42      | -3.75       | 91.19        |
| TCNB-MeSH             | -10.99                 | -6.77           | 17.14            | -0.63     | -4.78      | -5.41       | 88.36        |
| TCNB-EtSH             | -9.39                  | -6.07           | 16.96            | 1.50      | -7.34      | -5.84       | 125.70       |
| TCNB-DMS              | -13.06                 | -8.24           | 21.11            | -0.18     | -6.11      | -6.29       | 97.14        |
| TCNB-THT              | -11.59                 | -8.42           | 21.61            | 1.60      | -8.00      | -6.40       | 124.99       |

**Coordinates of all the atoms in the C-H···S bound optimized conformers in XYZ format  
computed at *cp*-MP2/aug-cc-pVDZ level**

**TCNB-H<sub>2</sub>S**

|   |             |             |             |
|---|-------------|-------------|-------------|
| C | -0.62555100 | 1.74397700  | -0.00307100 |
| C | 0.50035200  | 0.87593200  | 0.03779200  |
| C | 0.31946100  | -0.52116100 | 0.05361600  |
| C | -0.98291600 | -1.05739200 | 0.02994400  |
| C | -2.11084500 | -0.19155100 | -0.01091900 |
| C | -1.92664800 | 1.20498600  | -0.02759800 |
| C | -1.16663300 | -2.48597100 | 0.04881100  |
| C | -3.44413000 | -0.73557000 | -0.03498600 |
| C | 1.83447300  | 1.41929000  | 0.06445000  |
| C | -0.44121900 | 3.17219500  | -0.01887400 |
| N | -4.54993900 | -1.17671300 | -0.05467500 |
| N | -1.31347000 | -3.66742200 | 0.06656100  |
| N | 2.94497400  | 1.84833400  | 0.08843400  |
| N | -0.29461300 | 4.35380200  | -0.03157600 |
| H | 1.19231700  | -1.18128900 | 0.08222200  |
| H | -2.79328800 | 1.87010000  | -0.05917100 |
| S | 3.98257900  | -1.75417700 | -0.15911900 |
| H | 4.31736100  | -2.19853700 | 1.07101600  |
| H | 4.31561500  | -0.47785000 | 0.13562300  |



## TCNB-MeSH

|   |             |             |             |
|---|-------------|-------------|-------------|
| C | -1.04856100 | 1.72851200  | -0.01905800 |
| C | 0.11698200  | 0.92257500  | 0.10520900  |
| C | 0.00567700  | -0.47996600 | 0.17229600  |
| C | -1.26562200 | -1.08345800 | 0.11593500  |
| C | -2.43321800 | -0.28043200 | -0.00880300 |
| C | -2.31854200 | 1.12194300  | -0.07596300 |
| C | -1.37672500 | -2.51813100 | 0.18417800  |
| C | -3.73464700 | -0.89449800 | -0.06676000 |
| C | 1.41779600  | 1.53880400  | 0.16707300  |
| C | -0.93644700 | 3.16274000  | -0.08621600 |
| N | -4.81443400 | -1.39398400 | -0.11482100 |
| N | -1.46135100 | -3.70432800 | 0.24212000  |
| N | 2.49205000  | 2.04932400  | 0.22492500  |
| N | -0.85094500 | 4.34909600  | -0.14116100 |
| H | 0.91112300  | -1.08926300 | 0.25516000  |
| H | -3.21518800 | 1.73935300  | -0.17193700 |
| C | 4.75441300  | -0.60463600 | 0.55947200  |
| S | 3.55283900  | -1.34305500 | -0.61293100 |
| H | 4.59273000  | 0.48114400  | 0.51207600  |
| H | 4.57056300  | -0.95325800 | 1.58406500  |
| H | 5.78275800  | -0.83421400 | 0.25184600  |
| H | 3.86870200  | -2.63636400 | -0.38593600 |

## TCNB-EtSH

|   |             |             |             |
|---|-------------|-------------|-------------|
| C | 2.67819800  | -0.36222800 | -0.09409400 |
| C | 1.47239200  | -1.10023900 | 0.06605700  |
| C | 0.24491600  | -0.42624600 | 0.21839600  |
| C | 0.21669800  | 0.98220700  | 0.21233200  |
| C | 1.42045400  | 1.72322700  | 0.05194900  |
| C | 2.64597200  | 1.04604400  | -0.10068600 |
| C | -1.03839000 | 1.67208000  | 0.36899300  |
| C | 1.39174500  | 3.16308300  | 0.04455200  |
| C | 1.50240000  | -2.54049800 | 0.07454500  |
| C | 3.93504200  | -1.04800800 | -0.24997900 |
| N | 1.37402000  | 4.35364700  | 0.03716500  |
| N | -2.07294500 | 2.24845100  | 0.49543800  |
| N | 1.52621400  | -3.73089800 | 0.08362900  |
| N | 4.97893700  | -1.60593900 | -0.37941600 |
| H | -0.68985600 | -0.98450000 | 0.33943700  |
| H | 3.57205200  | 1.61312400  | -0.22401400 |
| C | -4.17115100 | 0.08743400  | -1.51092400 |
| C | -4.39557700 | -0.21391000 | -0.02918700 |
| S | -3.33773900 | -1.65095700 | 0.44148300  |
| H | -4.42741900 | -0.78187300 | -2.13677000 |
| H | -4.80231900 | 0.93523500  | -1.81898100 |
| H | -3.12107600 | 0.35948700  | -1.70176400 |
| H | -4.11802000 | 0.65226900  | 0.58704700  |
| H | -5.44554900 | -0.48009400 | 0.15991400  |
| H | -3.62376900 | -1.65283500 | 1.76196900  |

## TCNB-DMS

|   |             |             |             |
|---|-------------|-------------|-------------|
| C | 2.04674900  | 1.22307600  | 0.03872500  |
| C | 0.65627900  | 1.21885900  | -0.26107900 |
| C | -0.03292800 | 0.00006000  | -0.41504600 |
| C | 0.65911200  | -1.21718000 | -0.26149100 |
| C | 2.04963400  | -1.21816800 | 0.03838400  |
| C | 2.73664200  | 0.00325100  | 0.18441500  |
| C | -0.05958900 | -2.45804300 | -0.40169500 |
| C | 2.75817300  | -2.46198400 | 0.19608400  |
| C | -0.06604400 | 2.45763800  | -0.40069300 |
| C | 2.75233200  | 2.46854100  | 0.19676300  |
| N | 3.34913200  | -3.48708600 | 0.32922100  |
| N | -0.67414200 | -3.47251200 | -0.50860500 |
| N | -0.68512600 | 3.46943100  | -0.50673700 |
| N | 3.34089900  | 3.49498400  | 0.33017300  |
| H | -1.10686800 | -0.00105700 | -0.64791900 |
| H | 3.80518500  | 0.00453500  | 0.41392800  |
| S | -3.64145800 | -0.00752300 | -0.39825900 |
| C | -3.48759900 | -1.37672600 | 0.79666400  |
| C | -3.50523100 | 1.37442000  | 0.78402000  |
| H | -3.49957300 | -2.32043900 | 0.23209700  |
| H | -2.53665000 | -1.30469400 | 1.34974200  |
| H | -4.32965500 | -1.36358400 | 1.50500100  |
| H | -2.55286300 | 1.32042100  | 1.33658500  |
| H | -3.53027000 | 2.31267400  | 0.21086400  |
| H | -4.34649500 | 1.35632600  | 1.49316900  |

## TCNB-THT

|   |             |             |             |
|---|-------------|-------------|-------------|
| C | 2.12594400  | 1.50526000  | 0.04423500  |
| C | 0.81642900  | 1.21452000  | -0.42884800 |
| C | 0.41671300  | -0.11948200 | -0.64237300 |
| C | 1.31789900  | -1.16811700 | -0.37304200 |
| C | 2.62860200  | -0.88255500 | 0.10089500  |
| C | 3.02681400  | 0.45363600  | 0.30374000  |
| C | 0.89490500  | -2.53154600 | -0.56723900 |
| C | 3.55067700  | -1.95338500 | 0.37852500  |
| C | -0.12032700 | 2.27917200  | -0.68207000 |
| C | 2.53379500  | 2.86898900  | 0.26273000  |
| N | 4.31817400  | -2.83334400 | 0.61200200  |
| N | 0.52990700  | -3.65526000 | -0.71702500 |
| N | -0.91209400 | 3.14633700  | -0.88197700 |
| N | 2.87571800  | 3.99456600  | 0.44734600  |
| H | -0.59848800 | -0.33363900 | -1.00413200 |
| H | 4.03385900  | 0.67415000  | 0.66666800  |
| C | -2.79320200 | -1.53301700 | 0.68106800  |
| C | -3.64565500 | 0.87567300  | -0.19688800 |
| C | -3.15651400 | 0.82452100  | 1.25500400  |
| C | -3.41347400 | -0.60895300 | 1.73804600  |
| S | -3.13177200 | -0.73559800 | -0.95691800 |
| H | -3.23057200 | -2.54170100 | 0.67864200  |
| H | -1.70316700 | -1.62242100 | 0.82529900  |
| H | -3.19886800 | 1.70029000  | -0.77088800 |
| H | -4.74276800 | 0.95070700  | -0.24375600 |
| H | -2.07421600 | 1.04317200  | 1.29238500  |
| H | -3.67600100 | 1.57515700  | 1.87291600  |
| H | -2.97874300 | -0.80135500 | 2.73266400  |
| H | -4.50026600 | -0.78919100 | 1.79575800  |
